# Supplementary material for: Analysis of the Salivary Microbiome in Obstructive Sleep Apnea Syndrome Patients
Source: Hindawi journal article supplement (doi:10.1155/2020/6682020), 2020-12-22

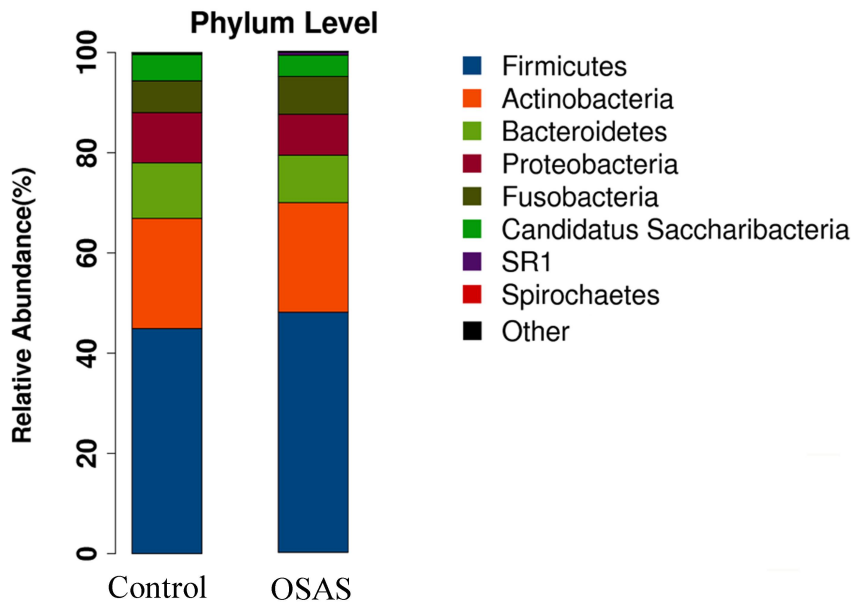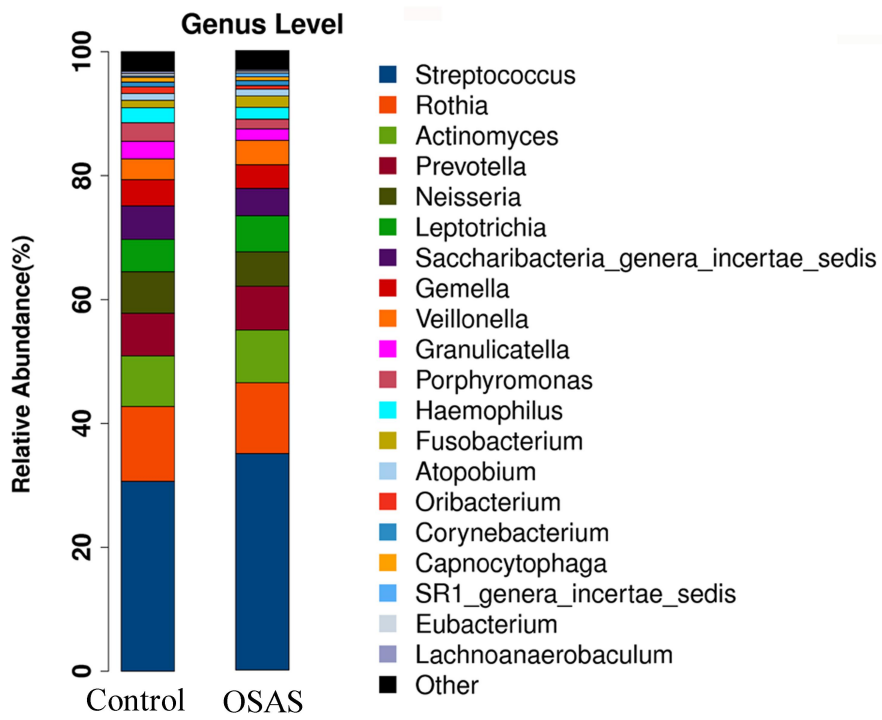

Supplement: f1 [file 6682020.f1.pdf]
